# Supplementary material
Source: publisher figshare collection journal article supplement (https://acs.figshare.com/ndownloader/files/3870391)
Supplement: Supplementary file 1 [file 3870391]

# Supporting Information

## Histidine derived nontoxic nitrogen-doped carbon dots for sensing and bioimaging applications

*He Huang<sup>1</sup>, Chunguang Li<sup>1\*</sup>, Shoujun Zhu<sup>2</sup>, Hailong Wang<sup>2</sup>, Cailing Chen<sup>1</sup>, Zhaorui Wang<sup>1</sup>, Tianyu Bai<sup>1</sup>, Zhan Shi<sup>1\*</sup>, Shouhua Feng<sup>1</sup>*

1 State Key Lab of Inorganic Synthesis and Preparative Chemistry, College of Chemistry, Jilin University, Changchun 130012, P.R. China

2 State Key Lab of Supramolecular Structure and Materials, College of Chemistry, Jilin University, Changchun 130012, P.R. China

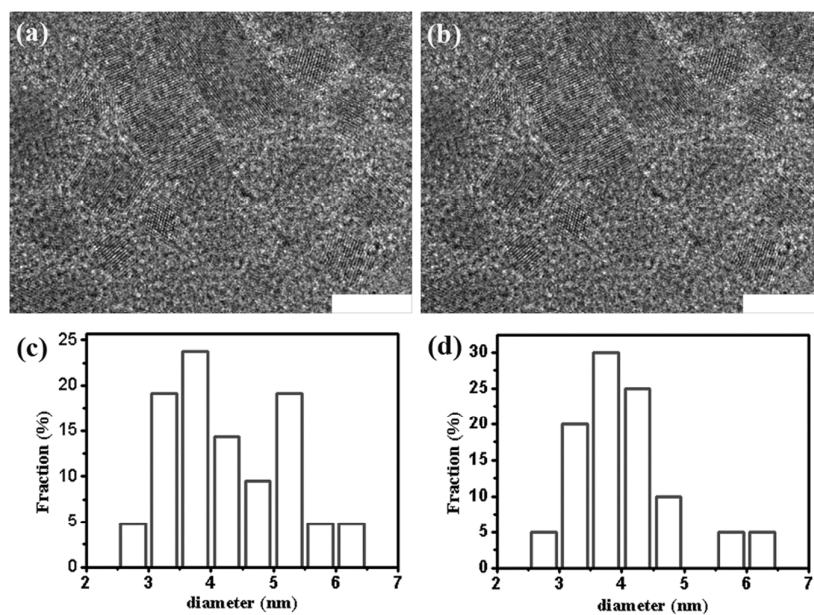

Fig. S1 TEM images of C-10 and C-30 (a,b) the scale bar is 10 nm, particle size distribution histograms of C-10 and C-30 (c,d).

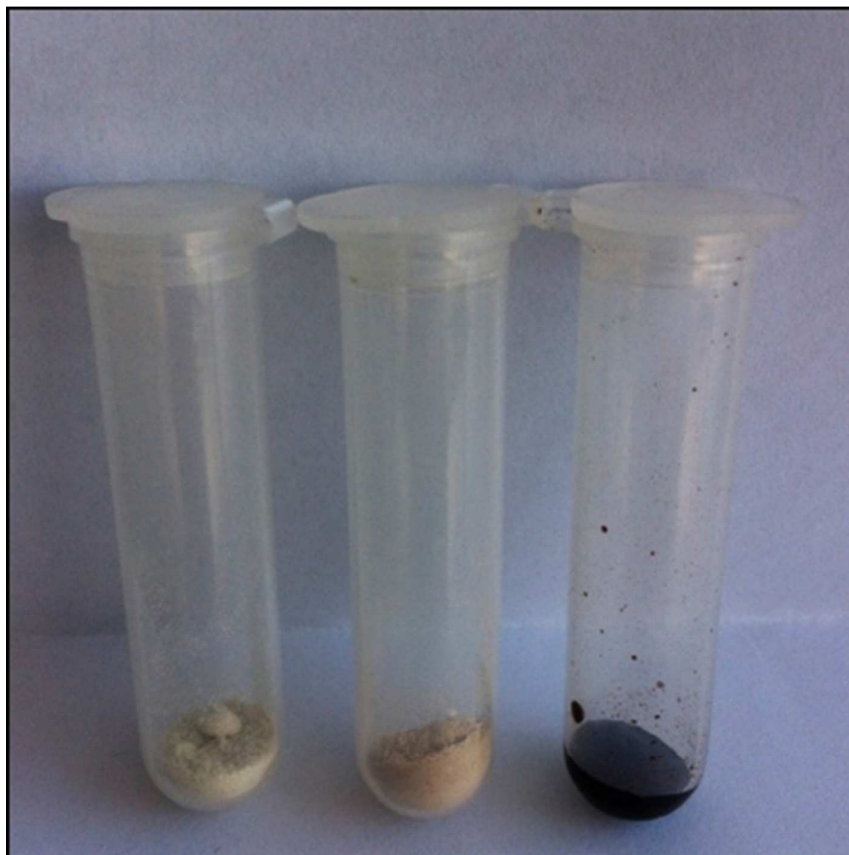

Fig. S2 Photograph of C-10, C-30 and C-60 from left to right.

Table 1 Element analysis of C-10, C-30 and C-60.

|      | Test molecule                                                           | C (%) | H (%) | O (Cal.) (%) | N (%) |
|------|-------------------------------------------------------------------------|-------|-------|--------------|-------|
| C-10 | C <sub>2.67</sub> H <sub>6.77</sub> O <sub>2.67</sub> N <sub>1.32</sub> | 32.00 | 6.770 | 42.72        | 18.51 |
| C-30 | C <sub>3.79</sub> H <sub>5.85</sub> O <sub>1.41</sub> N <sub>1.87</sub> | 45.47 | 5.852 | 22.548       | 26.13 |
| C-60 | C <sub>3.86</sub> H <sub>6.20</sub> O <sub>1.52</sub> N <sub>1.65</sub> | 46.36 | 6.202 | 24.318       | 23.12 |

Table 2 Quantum yield of the CDs samples.

| Substance       | Area      | Abs. at 360nm | Refractive<br>index | QY (%) |
|-----------------|-----------|---------------|---------------------|--------|
| Quinine sulfate | 181470340 | 0.024         | 1.33                | 54.6   |
| C-10            | 4653085   | 0.024         | 1.33                | 1.4    |
| C-30            | 8368720   | 0.024         | 1.33                | 2.5    |
| C-60            | 29580330  | 0.024         | 1.33                | 8.9    |

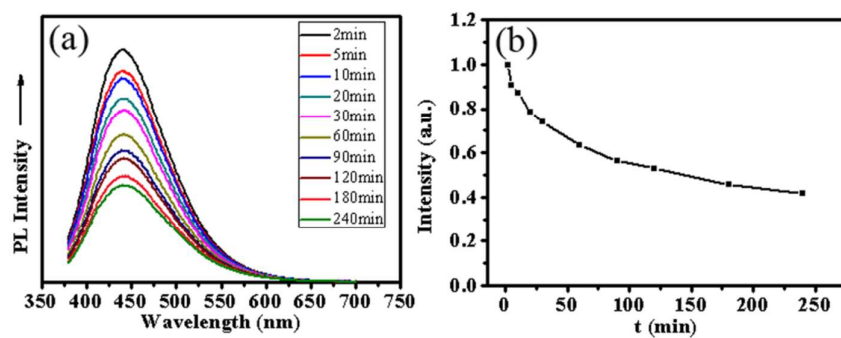

Fig. S3 (a) Dependence of photoluminescence intensity on UV excitation time for C-60 in DI water. (b) Dependence of photoluminescence intensity on UV excitation time for C-60 in DI water after normalization. The concentration of C-60 was 0.01mg.ml. (The excitation wavelength was 365nm, and the intensity of the hand-held UV lamp was 8W/cm. )
